# Supplementary material
Source: PubMed Central journal article supplement (PMC7735445)
Supplement: Laux-Supplemental-Data.pdf [file Laux-Supplemental-Data.pdf]

**SUPPLEMENTAL DATA**

| Fungal Genotype | Study Site | Urine Antigen Testing |                 |       |       |                 |       |       |      |      |      | Units     | Total Tests |   |           |    |
|-----------------|------------|-----------------------|-----------------|-------|-------|-----------------|-------|-------|------|------|------|-----------|-------------|---|-----------|----|
|                 |            | T1 <sup>1</sup>       | T2 <sup>2</sup> |       |       | T3 <sup>3</sup> |       |       |      |      |      |           |             |   |           |    |
| B. dermatitidis | MCHS       | 0                     |                 |       |       |                 |       |       |      |      |      | ng/ml     | 1           |   |           |    |
| B. dermatitidis | MCHS       | 0                     |                 |       |       |                 |       |       |      |      |      | ng/ml     | 1           |   |           |    |
| B. dermatitidis | MCHS       | 0                     |                 |       |       |                 |       |       |      |      |      | ng/ml     | 1           |   |           |    |
| B. gilchristii  | MCHS       | 0                     | 0               |       |       |                 |       |       |      |      |      | ng/ml     | 2           |   |           |    |
| B. gilchristii  | MCHS       | 0                     | 0               |       |       |                 |       |       |      |      |      | ng/ml     | 2           |   |           |    |
| B. gilchristii  | MCHS       | 0.29                  | 0               | 0     |       |                 |       |       |      |      |      | ng/ml     | 3           |   |           |    |
| B. gilchristii  | MCHS       | 0.37                  |                 |       |       |                 |       |       |      |      |      | EIA units | 1           |   |           |    |
| B. dermatitidis | MCHS       | 0.41                  |                 |       |       |                 |       |       |      |      |      | ng/ml     | 1           |   |           |    |
| B. dermatitidis | MCHS       | 0.41                  |                 |       |       |                 |       |       |      |      |      | ng/ml     | 1           |   |           |    |
| B. gilchristii  | MCHS       | 0.50                  |                 |       |       |                 |       |       |      |      |      | ng/ml     | 1           |   |           |    |
| B. dermatitidis | MCHS       | 0.86                  |                 |       |       |                 |       |       |      |      |      | ng/ml     | 1           |   |           |    |
| B. dermatitidis | MCHS       | 1.07                  |                 |       |       |                 |       |       |      |      |      | ng/ml     | 1           |   |           |    |
| B. gilchristii  | MCHS       | 1.11                  | 0.42            | 1.09  | 0     | 0               |       |       |      | 0    | 0    | ng/ml     | 7           |   |           |    |
| B. gilchristii  | MCHS       | 1.16                  |                 |       |       |                 |       |       |      |      |      | ng/ml     | 1           |   |           |    |
| B. gilchristii  | MCHS       | 1.21                  | 1.44            | 0.34  | 0.22  | 0.00            |       |       |      |      |      | ng/ml     | 5           |   |           |    |
| B. gilchristii  | MCHS       | 1.22                  | 1.66            | 0.82  |       |                 |       |       |      | 0.69 | 0.23 | 0.23      | <0.02       | 0 | ng/ml     | 8  |
| B. dermatitidis | MCHS       | 1.50                  |                 |       |       |                 |       |       |      |      |      |           |             |   | ng/ml     | 1  |
| B. gilchristii  | MCHS       | 1.97                  | 2.25            | 1.19  | 0.34  | 0.30            | 0     | <0.02 |      | 0    | 0    |           |             |   | ng/ml     | 9  |
| B. gilchristii  | MCHS       | 2.16                  | 1.55            | 4.03  | 1.50  | 1.16            | 0.48  | 0.42  | 0    |      |      |           |             |   | ng/ml     | 8  |
| B. gilchristii  | MCHS       | 2.34                  |                 |       |       |                 |       |       |      |      |      |           |             |   | ng/ml     | 1  |
| B. dermatitidis | MCHS       | 2.66                  |                 |       |       |                 |       |       |      |      |      |           |             |   | ng/ml     | 1  |
| B. dermatitidis | MCHS       | 2.86                  |                 |       |       |                 |       |       |      |      |      |           |             |   | ng/ml     | 1  |
| B. gilchristii  | MCHS       | 3.06                  | 0               |       |       |                 |       |       |      |      |      |           |             |   | EIA units | 2  |
| B. gilchristii  | MCHS       | 3.61                  |                 |       |       |                 |       |       |      |      |      |           |             |   | ng/ml     | 1  |
| B. gilchristii  | MCHS       | 4.02                  |                 |       |       |                 |       |       |      |      |      |           |             |   | EIA units | 1  |
| B. dermatitidis | MCHS       | 4.98                  |                 |       |       |                 |       |       |      |      |      |           |             |   | ng/ml     | 1  |
| B. gilchristii  | MCHS       | 5.57                  | 0               |       |       |                 |       |       |      |      |      |           |             |   | EIA units | 2  |
| B. gilchristii  | MCHS       | 6.28                  | 14.05           | 14.62 | 4.17  |                 |       |       |      | 2.73 | 1.43 | 0.55      | 0.44        |   | ng/ml     | 8  |
| B. gilchristii  | MCHS       | 7.29                  |                 |       |       |                 |       |       |      |      |      |           |             |   | EIA units | 1  |
| B. gilchristii  | MCHS       | 8.63                  |                 |       |       |                 |       |       |      |      |      |           |             |   | EIA units | 1  |
| B. dermatitidis | MCHS       | 9.27                  |                 |       |       |                 |       |       |      |      |      |           |             |   | ng/ml     | 1  |
| B. gilchristii  | MCHS       | 15.90                 |                 |       |       |                 |       |       |      |      |      |           |             |   | EIA units | 1  |
| B. gilchristii  | MCHS       | 16.34                 | 14.27           | 9.31  | 7.19  | 6.84            | 16.70 |       |      |      |      |           |             |   | EIA units | 6  |
| B. gilchristii  | MCHS       | 18.82                 | 17.14           |       |       |                 |       |       |      |      |      |           |             |   | EIA units | 2  |
| B. gilchristii  | MCHS       | 19.58                 |                 |       |       |                 |       |       |      |      |      |           |             |   | EIA units | 1  |
| B. gilchristii  | MCHS       | 25.20                 |                 |       |       |                 |       |       |      |      |      |           |             |   | EIA units | 1  |
| B. gilchristii  | MCHS       | 67.19                 | 2.49            | 54.94 | 47.83 | 0.42            | 26.34 | 3.26  | 0.65 | 0.42 | 0.27 | 0.20      | 0           |   | EIA units | 12 |
| B. dermatitidis | MCHS       | NT                    | 0               |       |       |                 |       |       |      |      |      |           |             |   | ng/ml     | 1  |
| B. dermatitidis | MCHS       | NT                    | <0.02           |       |       |                 |       |       |      |      |      |           |             |   | ng/ml     | 1  |
| B. dermatitidis | MCHS       | NT                    | 0               | 0     |       |                 |       |       |      |      |      |           |             |   | ng/ml     | 2  |
| B. dermatitidis | MCHS       | NT                    | 0.33            | 0.2   |       |                 |       |       |      |      |      | 0         | 0           |   | ng/ml     | 4  |
| B. gilchristii  | MCHS       | NT                    | 0               |       |       |                 |       |       |      |      |      |           |             |   | EIA units | 1  |
| B. gilchristii  | MCHS       | NT                    | 0               |       |       |                 |       |       |      |      |      |           |             |   | ng/ml     | 1  |
| B. gilchristii  | MCHS       | NT                    | 0               |       |       |                 |       |       |      |      |      |           |             |   | ng/ml     | 1  |
| B. gilchristii  | MCHS       | NT                    | 0               |       |       |                 |       |       |      |      |      |           |             |   | ng/ml     | 1  |
| B. gilchristii  | MCHS       | NT                    | 2.67            |       |       |                 |       |       |      |      |      |           |             |   | EIA units | 1  |
| B. gilchristii  | MCHS       | NT                    | 0.95            | 0.75  | 7.39  |                 |       |       |      |      |      |           |             |   | EIA units | 3  |
| B. gilchristii  | MCHS       | NT                    | 14.05           | 7.69  | 2.35  |                 |       |       |      |      |      |           |             |   | EIA units | 3  |
| B. gilchristii  | MCHS       | NT                    | 10.09           | >14.7 | 9.41  | 10.60           | 5.16  | 4.73  | 1.80 | 1.39 | 0.87 | 0.52      | 0.24        | 0 | ng/ml     | 12 |
